# Supplementary material for: Power of data in quantum machine learning
Source: Nat Commun. 2021 May 11;12:2631. doi: 10.1038/s41467-021-22539-9 (PMC8113501; doi:10.1038/s41467-021-22539-9)
Supplement: Supplementary file 2 — Source Data [file 41467_2021_22539_MOESM2_ESM.xlsx]

## Sheet: Fig. 3 (a) dimension
	system size	Q (E1)	Q (E2)	Q (E3)	PQ (E1)	PQ (E2)	PQ (E3)
0	3	1.54127	1.92351	3.2732	1.48534	1.77484	2.4418
1	4	2.11244	4.70966	8.69989	1.78498	2.56824	3.55002
2	5	3.14537	13.9286	22.5602	2.18714	3.56297	4.36665
3	6	4.58113	35.0197	85.8269	2.55624	3.99334	6.18244
4	7	7.21247	81.807	170.099	3.08954	4.4326	7.5771
5	8	10.9218	139.964	318.07	3.59942	4.5251	9.17549
6	9	16.9961	214.314	448.743	4.27031	4.82056	10.4209
7	10	26.6133	306.43	566.054	5.06097	5.21589	10.8948
8	11	38.5242	379.847	639.168	5.8323	5.48782	11.2575
9	12	51.8598	448.759	690.256	6.55699	5.77359	12.2501
10	13	65.9324	502.856	749.146	7.16689	6.07192	12.6183
11	14	85.4428	544.773	748.492	7.97739	6.41592	12.8393
12	15	106.483	583.39	779.11	8.78656	6.7826	13.5277
13	16	129.151	612.071	780.853	9.54347	7.09457	13.1993
14	17	155.516	637.82	791.655	10.4657	7.50142	14.0459
15	18	181.23	661.684	795.6	11.2431	7.88564	13.7342
16	19	205.089	678.43	796.738	12.047	8.28291	14.8646
17	20	233.628	691.917	797.513	12.9842	8.6549	14.1217
18	21	260.229	700.947	798.159	13.8417	9.04939	14.207
19	22	281.368	712.006	799.096	14.5271	9.47757	14.6128
20	23	303.893	722.088	799.539	15.0859	9.91495	15.3403
21	24	329.982	728.653	799.63	15.8929	10.2894	14.1177
22	25	351.343	733.499	799.647	16.5541	10.6904	15.215
23	26	373.432	741.303	799.703	17.1436	11.1628	15.8593
24	27	395.545	748.126	799.696	17.7557	11.631	16.4895
25	28	417.708	755.316	799.596	18.3635	12.1498	17.1327

## Sheet: Fig. 3 (a) geometric
	system size	Q (E1)	Q (E2)	Q (E2)	PQ (E1)	PQ (E2)	PQ (E3)
0	3	1.05805	2.71027	3.21286	1.51711	4.1142	5.64053
1	4	1.21007	3.25978	5.8404	1.77038	6.37387	9.8293
2	5	1.21389	4.90501	7.98682	1.97615	7.7537	12.1557
3	6	1.31425	5.35263	6.56858	2.16181	7.95763	13.8143
4	7	1.33201	5.3706	6.06846	2.39389	8.57441	13.8455
5	8	1.20847	5.32211	4.57609	2.50975	9.25262	13.0388
6	9	1.19678	5.34505	3.60316	2.64315	9.13863	14.0241
7	10	1.21347	5.11966	2.8469	2.71148	8.2784	11.9364
8	11	1.26016	4.93069	2.39061	2.77976	8.34589	11.79
9	12	1.3235	4.56376	1.99557	2.83394	8.45624	11.8903
10	13	1.45774	4.43196	1.51224	2.8675	8.58282	12.3083
11	14	1.48051	4.16386	1.48924	2.90803	8.84466	11.9192
12	15	1.36346	3.76526	1.25898	2.96129	9.02159	11.6811
13	16	1.27065	3.38059	1.27094	2.99878	9.28095	10.4639
14	17	1.17787	3.65464	1.11754	3.00892	9.08043	10.0329
15	18	1.11592	3.44513	1.17402	3.03818	8.82153	9.884
16	19	1.08541	2.91829	1.04671	3.08705	8.56085	9.82892
17	20	1.08966	2.87284	1.22586	3.10459	8.33893	10.0147
18	21	1.10063	3.1511	1.05867	3.1557	8.29871	10.1061
19	22	1.121	2.70421	1.21988	3.19868	8.14594	10.2206
20	23	1.15028	2.80527	1.05086	3.19106	8.05645	10.3439
21	24	1.19819	2.62034	1.00541	3.23922	8.18753	10.3176
22	25	1.2502	2.54043	0.995405	3.25155	8.1093	10.2926
23	26	1.28817	2.34087	0.996189	3.29041	8.14859	10.1979
24	27	1.31455	2.21472	0.953511	3.33746	8.17488	10.1012
25	28	1.3262	2.10944	0.944914	3.37419	8.22957	9.99639

## Sheet: Fig. 3 (b) Q E1
	system size	Quantum kernel	Best classical ML	Proj. quantum kernel
0	3	7.02978e-05	7.5939e-05	0.000168866
1	4	0.000289858	0.000292234	0.000580707
2	5	0.000565831	0.000594289	0.00119012
3	6	0.00117665	0.00131143	0.00167783
4	7	0.0016929	0.00274145	0.00229939
5	8	0.0029079	0.00483126	0.0029225
6	9	0.00997035	0.00759245	0.00344145
7	10	0.0197859	0.00951274	0.00342888
8	11	0.0268419	0.0112455	0.00607473
9	12	0.0368483	0.0115856	0.00753967
10	13	0.0451432	0.012804	0.00760873
11	14	0.059301	0.0110537	0.007818
12	15	0.0661431	0.0151111	0.00978916
13	16	0.0736623	0.0159391	0.00905364
14	17	0.073131	0.016704	0.0120762
15	18	0.0770193	0.0174745	0.0107504
16	19	0.0836678	0.0177046	0.011925
17	20	0.0795597	0.0209304	0.0137825
18	21	0.0835914	0.0182695	0.0159576
19	22	0.0867237	0.0217139	0.0175415
20	23	0.0922071	0.0195448	0.0136302
21	24	0.089657	0.0231137	0.0218372
22	25	0.101841	0.022434	0.0216387
23	26	0.093114	0.0240914	0.0175124
24	27	0.0924043	0.0258104	0.0245413
25	28	0.091228	0.0300307	0.0270307

## Sheet: Fig. 3 (b) Q E2
	system size	Quantum kernel	Best classical ML	Proj. quantum kernel
0	3	0.000120996	0.0125261	0.00294291
1	4	0.000205712	0.0303621	0.016466
2	5	0.00219482	0.0459355	0.0283789
3	6	0.0170523	0.0588889	0.0380551
4	7	0.0389913	0.0612214	0.043871
5	8	0.0674739	0.0613708	0.0392857
6	9	0.0989297	0.0631356	0.0487582
7	10	0.126593	0.0633976	0.0464592
8	11	0.122116	0.0618861	0.0438546
9	12	0.128484	0.0630055	0.0425279
10	13	0.148322	0.0599575	0.0427431
11	14	0.127505	0.0617756	0.0425202
12	15	0.156255	0.0584193	0.0459974
13	16	0.1338	0.0582642	0.0424654
14	17	0.152986	0.0570451	0.0430431
15	18	0.126425	0.0597178	0.0422459
16	19	0.151152	0.0564693	0.0429266
17	20	0.166068	0.054328	0.0457723
18	21	0.140668	0.05584	0.0414681
19	22	0.135875	0.0552261	0.0419433
20	23	0.149623	0.0534914	0.0408744
21	24	0.165096	0.0515393	0.0405432
22	25	0.16329	0.0531925	0.0409234
23	26	0.15547	0.0531464	0.0422046
24	27	0.156043	0.0530423	0.0418478
25	28	0.154928	0.0527066	0.040709

## Sheet: Fig. 3 (b) Q E3
	system size	Quantum kernel	Best classical ML	Proj. quantum kernel
0	3	0.000191271	0.0490704	0.0306448
1	4	0.000715259	0.107474	0.0533103
2	5	0.00358555	0.135198	0.0650631
3	6	0.0272132	0.138113	0.0732246
4	7	0.0422482	0.15637	0.0683464
5	8	0.0658171	0.155725	0.0739782
6	9	0.107884	0.134588	0.0782142
7	10	0.119445	0.138418	0.0890294
8	11	0.124425	0.153004	0.0911401
9	12	0.136039	0.144474	0.0844635
10	13	0.141748	0.137678	0.0806464
11	14	0.140717	0.13365	0.0694048
12	15	0.128511	0.122359	0.0860922
13	16	0.134445	0.131931	0.0779674
14	17	0.134515	0.130118	0.0895803
15	18	0.149831	0.144211	0.0796803
16	19	0.128917	0.121286	0.0819561
17	20	0.133047	0.128026	0.0843293
18	21	0.114535	0.108205	0.0792805
19	22	0.122283	0.118884	0.0746428
20	23	0.134953	0.132339	0.0838732
21	24	0.139155	0.136375	0.0778414
22	25	0.11743	0.113169	0.0702396
23	26	0.124877	0.119075	0.0749627
24	27	0.123874	0.117552	0.0749923
25	28	0.12352	0.117054	0.0751746

## Sheet: Fig. 3 (b) C
	system size	Q. kernel (E1)	Q. kernel (E2)	Q. kernel (E3)	Proj. Q. kernel (E1)	Proj. Q. kernel (E2)	Proj. Q. kernel (E3)	Best Classical ML
0	3	0.1195	0.1215	0.265	0.1175	0.117	0.2585	0.1085
1	4	0.101	0.115	0.212	0.098	0.1325	0.288	0.079
2	5	0.0725	0.1025	0.244	0.069	0.125	0.3145	0.071
3	6	0.087	0.0895	0.2595	0.0875	0.1335	0.312	0.076
4	7	0.07	0.098	0.3045	0.069	0.147	0.3135	0.066
5	8	0.0635	0.1195	0.32	0.0605	0.162	0.327	0.058
6	9	0.0585	0.1495	0.332	0.054	0.17	0.335	0.0655
7	10	0.071	0.1625	0.328	0.0675	0.178	0.3625	0.0585
8	11	0.0625	0.1865	0.3825	0.0625	0.188	0.372	0.056
9	12	0.0505	0.2075	0.383	0.0505	0.21	0.371	0.05
10	13	0.055	0.201	0.3935	0.0525	0.201	0.38	0.0525
11	14	0.059	0.2375	0.41	0.057	0.21	0.3555	0.056
12	15	0.057	0.2265	0.469	0.0535	0.212	0.367	0.0495
13	16	0.054	0.2235	0.46	0.0545	0.214	0.376	0.053
14	17	0.051	0.258	0.4645	0.0475	0.2255	0.3695	0.049
15	18	0.0465	0.263333	0.484	0.045	0.238333	0.392	0.0485
16	19	0.054	0.2885	0.4855	0.054	0.238	0.3675	0.0475
17	20	0.063	0.293	0.5005	0.057	0.215	0.3735	0.047
18	21	0.053	0.305	0.5035	0.0475	0.235	0.3735	0.0485
19	22	0.052	0.3145	0.484	0.048	0.23	0.3805	0.053
20	23	0.055	0.311	0.501	0.045	0.2345	0.381	0.0505
21	24	0.0527778	0.32625	0.4945	0.0494444	0.22625	0.3835	0.04
22	25	0.0555	0.3465	0.491	0.0425	0.233	0.3785	0.049
23	26	0.06	0.367	0.4955	0.044	0.2515	0.366	0.055
24	27	0.0613	0.3699	0.4975	0.0438	0.2528	0.3634	0.0554
25	28	0.0609	0.373	0.4971	0.0437	0.2551	0.36	0.0547

## Sheet: Fig. 4 (PQK E1)
	system size	Best C. ML (N=100)	Best C. ML (N=600)	Proj. Q. kernel (N=100)	Proj. Q. kernel (N=600)	Q. kernel (N=100)	Q. kernel (N=600)
0	3	0.847714	0.8675	0.852	0.87	0.843143	0.865
1	4	0.840286	0.8715	0.848571	0.8775	0.836571	0.8665
2	5	0.822429	0.874	0.836429	0.8805	0.811143	0.865
3	6	0.796286	0.859	0.810429	0.8705	0.791571	0.8535
4	7	0.791143	0.868	0.812	0.8805	0.788429	0.859
5	8	0.779857	0.851	0.800571	0.8585	0.775	0.8395
6	9	0.780286	0.8385	0.803714	0.855	0.768429	0.8245
7	10	0.747429	0.8325	0.768286	0.849	0.748143	0.821
8	11	0.750714	0.8435	0.758571	0.86	0.747	0.8315
9	12	0.742	0.8185	0.762571	0.844	0.737429	0.8165
10	13	0.738429	0.857	0.753714	0.87	0.735286	0.844
11	14	0.731429	0.8335	0.751	0.851	0.733429	0.8235
12	15	0.742286	0.825	0.745571	0.8485	0.743286	0.8155
13	16	0.748714	0.817	0.749143	0.8345	0.75	0.814
14	17	0.737429	0.8105	0.748429	0.8355	0.74	0.8045
15	18	0.732143	0.8145	0.738143	0.8405	0.737143	0.795
16	19	0.750571	0.821	0.754714	0.8415	0.756571	0.818
17	20	0.735714	0.8205	0.748714	0.8385	0.742857	0.802
18	21	0.746571	0.8205	0.757143	0.8385	0.749857	0.8035
19	22	0.741	0.8265	0.753714	0.8405	0.754286	0.8155
20	23	0.758286	0.8235	0.762429	0.8395	0.759571	0.8175
21	24	0.741587	0.829444	0.75381	0.848889	0.749841	0.811111
22	25	0.755571	0.8245	0.762143	0.8375	0.745714	0.8095
23	26	0.761571	0.838	0.769857	0.848	0.759714	0.816
24	27	0.763567	0.8425	0.772352	0.8485	0.763065	0.8162
25	28	0.765044	0.8428	0.773453	0.8503	0.764309	0.8163
26	29	0.754429	0.823	0.760143	0.827
27	30	0.771429	0.827	0.777571	0.831

## Sheet: Fig. 4 (PQK E2)
	system size	Best C. ML (N=100)	Best C. ML (N=600)	Proj. Q. kernel (N=100)	Proj. Q. kernel (N=600)	Q. kernel (N=100)	Q. kernel (N=600)
0	3	0.794	0.8485	0.824429	0.8685	0.817429	0.8445
1	4	0.767857	0.8095	0.807429	0.8465	0.790714	0.8265
2	5	0.643286	0.7625	0.765714	0.8635	0.667571	0.779
3	6	0.674429	0.756	0.775714	0.838	0.666286	0.7495
4	7	0.690714	0.782	0.770714	0.8545	0.674429	0.7635
5	8	0.698286	0.786	0.776286	0.8655	0.677429	0.7575
6	9	0.654857	0.7295	0.777286	0.849	0.658714	0.7155
7	10	0.720143	0.796	0.821429	0.8605	0.732714	0.7655
8	11	0.710714	0.7865	0.815714	0.855	0.734857	0.773
9	12	0.714714	0.789	0.825286	0.8605	0.736714	0.7695
10	13	0.716714	0.778	0.829571	0.853	0.736571	0.762
11	14	0.716143	0.7865	0.828143	0.8605	0.732286	0.7695
12	15	0.705286	0.7725	0.828571	0.8605	0.746857	0.7655
13	16	0.706143	0.776	0.814714	0.8545	0.712143	0.753
14	17	0.696571	0.788	0.815143	0.8715	0.679714	0.733
15	18	0.68127	0.778889	0.820317	0.861111	0.706349	0.732778
16	19	0.71	0.785	0.821714	0.8685	0.737714	0.7775
17	20	0.704714	0.796	0.823714	0.8735	0.703857	0.7675
18	21	0.713143	0.7825	0.835571	0.877	0.746429	0.771
19	22	0.713143	0.771	0.829714	0.873	0.740857	0.771
20	23	0.714714	0.7655	0.828571	0.8555	0.701857	0.766
21	24	0.711786	0.795	0.825179	0.86875	0.70125	0.78875
22	25	0.718429	0.775	0.834714	0.8785	0.743714	0.773
23	26	0.720429	0.7725	0.828571	0.87	0.713286	0.7715
24	27	0.721235	0.7753	0.828551	0.869	0.708529	0.7726
25	28	0.72157	0.7744	0.827979	0.8689	0.704633	0.7727
26	29	0.725286	0.774	0.837857	0.8745
27	30	0.727286	0.7825	0.837	0.8695

## Sheet: Fig. 4 (PQK E3)
	system size	Best C. ML (N=100)	Best C. ML (N=600)	Proj. Q. kernel (N=100)	Proj. Q. kernel (N=600)	Q. kernel (N=100)	Q. kernel (N=600)
0	3	0.698	0.8085	0.814571	0.8695	0.698429	0.7335
1	4	0.650429	0.7435	0.801286	0.856	0.662	0.725
2	5	0.640143	0.725	0.791714	0.8635	0.663571	0.739
3	6	0.629571	0.719	0.762571	0.847	0.603143	0.685
4	7	0.587	0.6825	0.815	0.8575	0.727571	0.7935
5	8	0.604571	0.6855	0.771857	0.841	0.633714	0.6945
6	9	0.608857	0.6955	0.765286	0.853	0.577143	0.6645
7	10	0.583429	0.666	0.800286	0.855	0.637571	0.733
8	11	0.585857	0.6915	0.791857	0.837	0.576571	0.686
9	12	0.591286	0.697	0.781714	0.837	0.559714	0.654
10	13	0.573571	0.6615	0.783	0.845	0.519571	0.627
11	14	0.555286	0.6405	0.781143	0.851	0.551286	0.7025
12	15	0.546571	0.61	0.812	0.871	0.540571	0.703
13	16	0.546857	0.6175	0.809571	0.855	0.531	0.6575
14	17	0.574	0.6725	0.816857	0.864	0.493571	0.59
15	18	0.574571	0.6465	0.804143	0.856	0.506857	0.5195
16	19	0.589714	0.6565	0.820571	0.859	0.497	0.5035
17	20	0.575571	0.656	0.809571	0.8625	0.495429	0.4845
18	21	0.586286	0.6535	0.798	0.867	0.512714	0.4975
19	22	0.589	0.667	0.823143	0.866	0.514714	0.511
20	23	0.579143	0.65	0.821857	0.838	0.524857	0.51
21	24	0.569714	0.647	0.809429	0.8695	0.510571	0.487
22	25	0.563286	0.6235	0.810286	0.854	0.502571	0.483
23	26	0.568714	0.6505	0.819429	0.8645	0.512571	0.487
24	27	0.574483	0.6572	0.821823	0.865	0.51442	0.4864
25	28	0.579293	0.6626	0.824416	0.8648	0.515955	0.4872
26	29	0.556857	0.6205	0.802571	0.87
27	30	0.563714	0.631	0.800143	0.857

## Sheet: Supp. Fig. 2 (QK E1)
	system size	Best C. ML (N=100)	Best C. ML (N=600)	Proj. Q. kernel (N=100)	Proj. Q. kernel (N=600)	Q. kernel (N=100)	Q. kernel (N=600)
0	3	0.864714	0.8845	0.864857	0.887	0.863571	0.8785
1	4	0.848714	0.877	0.862429	0.881	0.848429	0.866
2	5	0.812	0.8755	0.827714	0.876	0.807	0.859
3	6	0.802286	0.859	0.810286	0.8615	0.792286	0.854
4	7	0.772714	0.8405	0.791	0.8525	0.766714	0.839
5	8	0.771143	0.866	0.792857	0.874	0.769571	0.8535
6	9	0.770286	0.8365	0.775429	0.845	0.745143	0.8265
7	10	0.751429	0.8435	0.767857	0.8565	0.747	0.8295
8	11	0.765286	0.828	0.767571	0.839	0.763	0.8205
9	12	0.748143	0.826	0.751857	0.8335	0.759857	0.819
10	13	0.770571	0.846	0.776714	0.8535	0.788143	0.848
11	14	0.774143	0.8335	0.785429	0.8505	0.792857	0.8345
12	15	0.775143	0.8335	0.785857	0.8525	0.795714	0.8385
13	16	0.758286	0.8395	0.767714	0.8425	0.778286	0.8365
14	17	0.784714	0.8425	0.792714	0.854	0.813429	0.844
15	18	0.773143	0.844	0.781143	0.845	0.796571	0.8395
16	19	0.758714	0.845	0.764571	0.8485	0.773429	0.834
17	20	0.754143	0.824	0.76	0.824	0.776286	0.8205
18	21	0.771286	0.825	0.775429	0.8295	0.783857	0.833
19	22	0.775286	0.8305	0.784714	0.829	0.786714	0.839
20	23	0.776714	0.8285	0.780143	0.83	0.778143	0.8155
21	24	0.769683	0.836667	0.777302	0.833889	0.770476	0.820556
22	25	0.760286	0.8255	0.768429	0.8235	0.765571	0.801
23	26	0.770571	0.8375	0.773429	0.84	0.756714	0.815
24	27	0.771028	0.841	0.774429	0.8417	0.756334	0.8156
25	28	0.773311	0.8437	0.77537	0.8432	0.754695	0.8153
26	29	0.531286	0.5685	0.523	0.548	0.500143	0.4875
27	30	0.534714	0.565	0.519714	0.546	0.496857	0.5005

[truncated: 5 more sheets: Supp. Fig. 2 (QK E2), Supp. Fig. 2 (QK E3), Supp. Fig. 3, Supp. Fig. 4 (bound), Supp. Fig. 4 (error)]
